# Supplementary material for: Human heterologous liver cells transiently improve hyperammonemia and ureagenesis in individuals with severe urea cycle disorders
Source: Springer Nature journal article supplement (doi:10.1007/s10545-017-0097-4), 2017-10-12
Supplement: MOESM1 [file 15129420]

| Primary Safety Variables | - Safety of the placement of an application catheter to the portal vein - Safety of the application of liver cells as measured by oxygen saturation, portal blood pressure and flow during the infusion |
| --- | --- |
| Secondary Safety Variables | - Vital signs - Laboratory parameters to monitor the safety of the procedures and the immunosuppression - Adverse events throughout the study |
| Secondary Efficacy Variables | - Number, duration and severity of metabolic crises (maximum ammonia concentration, duration of coma) - Changes in 13C-urea formation from baseline compared to 2 and 4 months (or earlier, if OLT was performed during listing period) after first liver cell infusion and, if available, up to 24 months after the final visit, in case further 13C-ureagenesis tests were performed after liver cell infusion - Detection of donor cell material in samples from the explanted liver taken after OLT |

**Supplementary table 1**: Primary and secondary endpoints of the study
